# Supplementary material for: Development and validation of a survey to measure features of clinical networks
Source: PubMed Central journal article supplement (PMC5045605; doi:10.1186/s12913-016-1800-0), 2016-09-30
Supplement: 12913_2016_1800_MOESM1_ESM.pdf [file 12913_2016_1800_MOESM1_ESM.pdf]

# NHMRC Partnership Grant Determinants of Effective Clinical Networks

Web survey

## Preamble

You have been invited to participate in this study because you have been involved with the clinical networks of the NSW Agency for Clinical Innovation (ACI) [formerly the Greater Metropolitan Clinical Taskforce (GMCT)].

The project is jointly funded by the National Health and Medical Research Council (NHMRC) and Agency for Clinical Innovation. The research is being undertaken in partnership with The Sax Institute, The Universities of Sydney, Newcastle and Melbourne and The Australian Catholic University and aims to examine the determinants of successful clinical networks.

We are interested to find out what makes some networks more successful than others. The results from this study will inform the establishment and maintenance of clinical networks so they can effectively improve the quality of care.

Participation in this survey is entirely voluntary. Submitting a completed survey is an indication of your consent to participate in the study. You can withdraw from the study at any time. All aspects of the study, including the results, will be strictly confidential. The networks will be de-identified in all reports relating to this study and will be labelled only as Networks 1-19. Network managers and chairs will not be identified by name in the publication of the results. No data will be given to ACI that identifies any network manager or chair.

If you would like further information on the study and how your responses will be used, please read the [participant information sheet](#).

## Section 1 – Linkages to ACI

From 2006 -2008

1.1 What was your primary network? (That is, the network you were most active in):

Please tick ONE:

|  | Network                         | Establishment Date | Network Manager | Co-Chairs        |
|--|---------------------------------|--------------------|-----------------|------------------|
|  | Transition Care                 | [DATE]             | [NAME]          | [NAME]<br>[NAME] |
|  | Cardiac                         | [DATE]             | [NAME]          | [NAME]<br>[NAME] |
|  | Neurosurgery                    | [DATE]             | [NAME]          | [NAME]<br>[NAME] |
|  | Endocrine                       | [DATE]             | [NAME]          | [NAME]<br>[NAME] |
|  | Aged Care                       | [DATE]             | [NAME]          | [NAME]<br>[NAME] |
|  | Gynaecology<br>Oncology         | [DATE]             | [NAME]          | [NAME]<br>[NAME] |
|  | Radiology                       | [DATE]             | [NAME]          | [NAME]<br>[NAME] |
|  | Nuclear Medicine                | [DATE]             | [NAME]          | [NAME]<br>[NAME] |
|  | Stroke                          | [DATE]             | [NAME]          | [NAME]<br>[NAME] |
|  | Home Enteral<br>Nutrition       | [DATE]             | [NAME]          | [NAME]<br>[NAME] |
|  | Urology                         | [DATE]             | [NAME]          | [NAME]<br>[NAME] |
|  | Gastroenterology                | [DATE]             | [NAME]          | [NAME]<br>[NAME] |
|  | Ophthalmology                   | [DATE]             | [NAME]          | [NAME]<br>[NAME] |
|  | Respiratory                     | [DATE]             | [NAME]          | [NAME]<br>[NAME] |
|  | Severe Burn<br>Injury Service   | [DATE]             | [NAME]          | [NAME]<br>[NAME] |
|  | Statewide Spinal<br>Cord Injury | [DATE]             | [NAME]          | [NAME]<br>[NAME] |
|  | Bone Marrow<br>Transplant       | [DATE]             | [NAME]          | [NAME]<br>[NAME] |
|  | Brain Injury<br>Directorate     | [DATE]             | [NAME]          | [NAME]<br>[NAME] |
|  | Renal                           | [DATE]             | [NAME]          | [NAME]<br>[NAME] |

1.2 In what year did you join the network or start to be involved? \_\_\_\_\_

### 1.3 What was your role in network?

- Chair/Executive Committee Member
- Executive & Steering Committee Member
- Expert Advisor
- Working group member
- Participant

## Section 2 - Engagement

### The following questions are about the importance of the network to you:

2.1 In the last 6 months how many hours have you devoted to network activities? E.g. attending network meetings, network correspondence, network quality improvement initiatives, network training activities

- <1hr
- 1-5hrs
- 5-10hrs
- 10-20hr
- 20-30hrs
- 30-40hrs
- >40hrs

2.2 On the scale provided please rate the extent to which you agree or disagree with each statement:

|                                                                             | strongly disagree | disagree | neither agree nor disagree | agree | strongly agree | Don't know |
|-----------------------------------------------------------------------------|-------------------|----------|----------------------------|-------|----------------|------------|
| I am committed to the network                                               |                   |          |                            |       |                |            |
| I believe in the work that the network undertakes                           |                   |          |                            |       |                |            |
| I am not involved in the day-to-day work of the network                     |                   |          |                            |       |                |            |
| My input to the network is not highly visible but is more behind the scenes |                   |          |                            |       |                |            |
| My views and ideas have contributed to network activities                   |                   |          |                            |       |                |            |
| I have not been able to help drive the network agenda                       |                   |          |                            |       |                |            |

## Section 3 - Clinical leadership

### The following questions relate to the leadership of the network

- 3.1 Based on your personal experience, how much do you agree or disagree with each statement about the **Network Manager (name to be inserted) of your network (name to be inserted)**:

|                                                                                                                           | strongly disagree | disagree | neither agree nor disagree | agree | strongly agree | Don't know |
|---------------------------------------------------------------------------------------------------------------------------|-------------------|----------|----------------------------|-------|----------------|------------|
| The network manager had an evidence-based vision                                                                          |                   |          |                            |       |                |            |
| The network manager was able to engage fellow professionals about service and quality improvement                         |                   |          |                            |       |                |            |
| The network manager brought others together to facilitate action and accomplish goals                                     |                   |          |                            |       |                |            |
| The network manager built strong and positive relationships with clinicians                                               |                   |          |                            |       |                |            |
| The network manager built strong and positive relationships with consumers                                                |                   |          |                            |       |                |            |
| The network manager built strong and positive relationships with hospital management                                      |                   |          |                            |       |                |            |
| The network manager did not collaborate with external parties and administrators (e.g. AHS) to support network operations |                   |          |                            |       |                |            |

3.2 On the scale provided please rate the extent to which you agree or disagree with each statement about the collaborative work of the **Network Co-Chairs (names to be inserted) in your network (name to be inserted)**:

|                                                                                                                             | strongly disagree | disagree | neither agree nor disagree | agree | strongly agree | Don't know |
|-----------------------------------------------------------------------------------------------------------------------------|-------------------|----------|----------------------------|-------|----------------|------------|
| The network co-chairs did not make explicit the values and purpose of the network                                           |                   |          |                            |       |                |            |
| The network co-chairs were champions for change                                                                             |                   |          |                            |       |                |            |
| The network co-chairs were not able to mobilize fellow professionals about service and quality improvement                  |                   |          |                            |       |                |            |
| The network co-chairs built strong and positive relationships with clinicians                                               |                   |          |                            |       |                |            |
| The network co-chairs built strong and positive relationships with consumers                                                |                   |          |                            |       |                |            |
| The network co-chairs built strong and positive relationships hospital management                                           |                   |          |                            |       |                |            |
| The network co-chairs did not collaborate with external parties and administrators (e.g. AHS) to support network operations |                   |          |                            |       |                |            |
| The network co-chairs worked cooperatively with senior leadership in NSW Health to make appropriate changes                 |                   |          |                            |       |                |            |

3.3 On the scale provided please rate the extent to which you agree or disagree with each statement about the role of the former **GMCT Executive** (now known as the ACI (names to be inserted) in your network (Peter Castaldi – Chief Executive, Kate Needham – Executive Director, Carol Pollock – Chair of the Board)

|                                                                                                  | strongly disagree | disagree | neither agree nor disagree | agree | strongly agree | Don't know |
|--------------------------------------------------------------------------------------------------|-------------------|----------|----------------------------|-------|----------------|------------|
| The GMCT Executive provided strong leadership and clear strategic direction                      |                   |          |                            |       |                |            |
| The GMCT Executive worked cooperatively with the wider health system to make appropriate changes |                   |          |                            |       |                |            |

## Section 4 - Internal management

**The following questions relate to how well you think the network was managed**

On the scale provided please rate the extent to which you agree or disagree with each statement about the management of the network:

|                                                                                                                  | strongly disagree | disagree | neither agree nor disagree | agree | strongly agree | Don't know |
|------------------------------------------------------------------------------------------------------------------|-------------------|----------|----------------------------|-------|----------------|------------|
| The network had multidisciplinary representation e.g. consumer, medical, nursing and allied health professionals |                   |          |                            |       |                |            |
| The network was dominated by a few individuals                                                                   |                   |          |                            |       |                |            |
| The network provided a supportive environment allowing all voices to be heard                                    |                   |          |                            |       |                |            |
| The network was effective in improving information sharing across the network                                    |                   |          |                            |       |                |            |
| The network effectively coordinated communication with people and organizations outside the network              |                   |          |                            |       |                |            |
| The network manager had good organisational abilities                                                            |                   |          |                            |       |                |            |

## Section 5 - Perception of external support

The following questions relate to the amount of support you believe the network received from external agencies or organisations

5.1 On the scale provided please rate the extent to which you agree or disagree with each statement about the network's relationship with **Hospital Management**:

|                                                                                                              | strongly disagree | disagree | neither agree nor disagree | agree | strongly agree | Don't know |
|--------------------------------------------------------------------------------------------------------------|-------------------|----------|----------------------------|-------|----------------|------------|
| There was strong support from hospital management for the work of my network                                 |                   |          |                            |       |                |            |
| Hospital management were not willing to implement changes based on the recommendations of my network         |                   |          |                            |       |                |            |
| Clinicians working in hospitals were willing to implement changes based on the recommendations of my network |                   |          |                            |       |                |            |

5.2 On the scale provided please rate the extent to which you agree or disagree with each statement about the networks relationship with **Area Health Services**:

|                                                                                                               | strongly disagree | disagree | neither agree nor disagree | agree | strongly agree | Don't know |
|---------------------------------------------------------------------------------------------------------------|-------------------|----------|----------------------------|-------|----------------|------------|
| AHS managers were aware of the ideas put forward by my network                                                |                   |          |                            |       |                |            |
| Area Health Service Managers were not willing to implement changes based on the recommendations of my network |                   |          |                            |       |                |            |

5.3 On the scale provided please rate the extent to which you agree or disagree with each statement about the networks relationship with **NSW Health**:

|                                                                                      | strongly disagree | disagree | neither agree nor disagree | agree | strongly agree | Don't know |
|--------------------------------------------------------------------------------------|-------------------|----------|----------------------------|-------|----------------|------------|
| The network workplans and agendas were aligned with state government strategic plans |                   |          |                            |       |                |            |
| NSW Health decision makers were not aware of the recommendations made by my network  |                   |          |                            |       |                |            |



## Section 6 - Perceived value

The following questions relate to how much you believe the network has made a difference:

Based on your experience, how much do you agree or disagree with each statement:

|                                                                   | strongly disagree | disagree | neither agree nor disagree | agree | strongly agree | Don't know |
|-------------------------------------------------------------------|-------------------|----------|----------------------------|-------|----------------|------------|
| The network's efforts have improved quality of care               |                   |          |                            |       |                |            |
| The network's efforts have improved patient outcomes              |                   |          |                            |       |                |            |
| The work of the network has not led to health system improvements |                   |          |                            |       |                |            |
| I would recommend joining this clinical network to a colleague    |                   |          |                            |       |                |            |
| The network does not help me professionally                       |                   |          |                            |       |                |            |

## Section 7

We may be developing some qualitative work in the future, exploring the features of successful networks... would you be interested in being asked to participate in this work that will involve an in-depth interview?

- YES
- NO

Do you have any additional comments you would like to make?

## Section 8 – About you

### 8.1 Gender:

- Male
- Female

### 8.2 What was your professional discipline (select ALL that apply):

- Medical Officer
- Nurse
- Consumer
- Allied Health
- Executive manager - non-health professional
- Researcher/academic
- Other

### 8.3 Where was your primary place of work? (select ONE):

- Hospital- principle referral
- Hospital – paediatric specialist
- Hospital – major non-metropolitan
- Hospital – district
- Hospital – community
- Hospital – private
- Hospital – other.
- Other (specify) \_\_\_\_\_

THANK YOU FOR YOUR TIME
