# Supplementary material for: Development and validation of a survey to measure features of clinical networks
Source: Springer Nature journal article supplement (doi:10.1186/s12913-016-1800-0), 2016-09-30
Supplement: MOESM2 [file 10803676]

|                                                                                                                           | Agree |             | Neutral |             | Disagree |             | Don't know |             |
|---------------------------------------------------------------------------------------------------------------------------|-------|-------------|---------|-------------|----------|-------------|------------|-------------|
|                                                                                                                           | N     | %           | N       | %           | N        | %           | N          | %           |
| <i>Perceived engagement</i>                                                                                               |       |             |         |             |          |             |            |             |
| I am committed to the network                                                                                             | 344   | <b>73.5</b> | 83      | <b>17.7</b> | 33       | <b>7.1</b>  | 8          | <b>1.7</b>  |
| I believe in the work that the network undertakes                                                                         | 401   | <b>85.7</b> | 40      | <b>8.6</b>  | 19       | <b>4.1</b>  | 7          | <b>1.5</b>  |
| I am not involved in the day-to-day work of the network                                                                   | 356   | <b>76.1</b> | 54      | <b>11.5</b> | 52       | <b>11.1</b> | 6          | <b>1.3</b>  |
| My input to the network is not highly visible but is more behind the scenes                                               | 241   | <b>51.5</b> | 119     | <b>25.4</b> | 82       | <b>17.5</b> | 25         | <b>5.4</b>  |
| My views and ideas have contributed to network activities                                                                 | 258   | <b>55.2</b> | 107     | <b>22.9</b> | 77       | <b>16.5</b> | 25         | <b>5.4</b>  |
| I have not been able to help drive the network agenda                                                                     | 145   | <b>31.0</b> | 134     | <b>28.6</b> | 169      | <b>36.1</b> | 20         | <b>4.3</b>  |
| <i>Perceived leadership of network manager</i>                                                                            |       |             |         |             |          |             |            |             |
| The network manager had an evidence-based vision                                                                          | 303   | <b>71.0</b> | 58      | <b>13.6</b> | 17       | <b>4.0</b>  | 49         | <b>11.5</b> |
| The network manager was able to engage fellow professionals about service and quality improvement                         | 314   | <b>73.5</b> | 43      | <b>10.1</b> | 28       | <b>6.6</b>  | 42         | <b>9.8</b>  |
| The network manager brought others together to facilitate action and accomplish goals                                     | 324   | <b>75.9</b> | 41      | <b>9.6</b>  | 24       | <b>5.6</b>  | 38         | <b>8.9</b>  |
| The network manager built strong and positive relationships with clinicians                                               | 305   | <b>71.4</b> | 56      | <b>13.1</b> | 25       | <b>5.9</b>  | 41         | <b>9.6</b>  |
| The network manager built strong and positive relationships with consumers                                                | 209   | <b>49.1</b> | 104     | <b>24.4</b> | 20       | <b>4.7</b>  | 93         | <b>21.8</b> |
| The network manager built strong and positive relationships with hospital management                                      |       |             |         |             |          |             |            |             |
| The network manager did not collaborate with external parties and administrators (e.g. AHS) to support network operations | 44    | <b>10.3</b> | 82      | <b>19.2</b> | 186      | <b>43.6</b> | 115        | <b>26.9</b> |

|                                                                                                                             | Agree |             | Neutral |             | Disagree |             | Don't know |             |
|-----------------------------------------------------------------------------------------------------------------------------|-------|-------------|---------|-------------|----------|-------------|------------|-------------|
|                                                                                                                             | N     | %           | N       | %           | N        | %           | N          | %           |
| <i>Perceived leadership of network co-chairs</i>                                                                            |       |             |         |             |          |             |            |             |
| The network co-chairs did not make explicit the values and purpose of the network                                           | 52    | <b>12.8</b> | 81      | <b>20.0</b> | 209      | <b>51.5</b> | 64         | <b>15.8</b> |
| The network co-chairs were champions for change                                                                             | 259   | <b>63.8</b> | 68      | <b>16.8</b> | 25       | <b>6.2</b>  | 54         | <b>13.3</b> |
| The network co-chairs were not able to mobilize fellow professionals about service and quality improvement                  | 59    | <b>14.5</b> | 84      | <b>20.7</b> | 194      | <b>47.8</b> | 69         | <b>17.0</b> |
| The network co-chairs built strong and positive relationships with other clinicians                                         | 250   | <b>61.6</b> | 71      | <b>17.5</b> | 22       | <b>5.4</b>  | 63         | <b>15.5</b> |
| The network co-chairs built strong and positive relationships with consumers                                                | 161   | <b>39.7</b> | 109     | <b>26.9</b> | 22       | <b>5.4</b>  | 114        | <b>28.1</b> |
| The network co-chairs built strong and positive relationships hospital management                                           | 128   | <b>31.5</b> | 114     | <b>28.1</b> | 33       | <b>8.1</b>  | 131        | <b>32.3</b> |
| The network co-chairs did not collaborate with external parties and administrators (e.g. AHS) to support network operations | 26    | <b>6.4</b>  | 81      | <b>20.0</b> | 171      | <b>42.1</b> | 128        | <b>31.5</b> |
| The network co-chairs worked cooperatively with senior leadership in NSW Health to make appropriate changes                 | 210   | <b>51.7</b> | 73      | <b>18.0</b> | 19       | <b>4.7</b>  | 104        | <b>25.6</b> |
| <i>Perceived leadership of the Agency Executive</i>                                                                         |       |             |         |             |          |             |            |             |
| The GMCT Executive provided strong leadership and clear strategic direction                                                 | 217   | <b>53.8</b> | 92      | <b>22.8</b> | 17       | <b>4.2</b>  | 77         | <b>19.1</b> |
| The GMCT Executive worked cooperatively with leaders in the wider health system to make appropriate changes                 | 223   | <b>55.3</b> | 84      | <b>20.8</b> | 16       | <b>4.0</b>  | 80         | <b>19.9</b> |

|                                                                                                                  | Agree |             | Neutral |             | Disagree |             | Don't know |             |
|------------------------------------------------------------------------------------------------------------------|-------|-------------|---------|-------------|----------|-------------|------------|-------------|
|                                                                                                                  | N     | %           | N       | %           | N        | %           | N          | %           |
| <i>Perceived strategic and operational management</i>                                                            |       |             |         |             |          |             |            |             |
| The network had multidisciplinary representation e.g. consumer, medical, nursing and allied health professionals | 318   | <b>81.8</b> | 29      | <b>7.5</b>  | 15       | <b>3.9</b>  | 27         | <b>6.9</b>  |
| The network was dominated by a few individuals                                                                   | 107   | <b>27.5</b> | 110     | <b>28.3</b> | 138      | <b>35.5</b> | 34         | <b>8.7</b>  |
| The network provided a supportive environment allowing all voices to be heard                                    | 249   | <b>64.0</b> | 78      | <b>20.0</b> | 31       | <b>7.0</b>  | 31         | <b>8.0</b>  |
| The network was effective in improving information sharing across the network                                    | 292   | <b>75.1</b> | 56      | <b>14.4</b> | 20       | <b>5.1</b>  | 21         | <b>5.4</b>  |
| The network effectively coordinated communication with people and organisations outside the network              | 217   | <b>55.8</b> | 77      | <b>19.8</b> | 33       | <b>8.5</b>  | 62         | <b>15.9</b> |
| The network manager had good organisational abilities                                                            | 281   | <b>72.2</b> | 52      | <b>13.4</b> | 16       | <b>4.1</b>  | 40         | <b>10.3</b> |
| <i>Perceived external support</i>                                                                                |       |             |         |             |          |             |            |             |
| There was strong support from hospital management for the work of my network                                     | 108   | <b>28.6</b> | 112     | <b>29.6</b> | 85       | <b>22.5</b> | 73         | <b>19.3</b> |
| Hospital management were not willing to implement changes based on the recommendations of my network             | 70    | <b>18.5</b> | 133     | <b>35.2</b> | 95       | <b>25.1</b> | 80         | <b>21.1</b> |
| Clinicians working in hospitals were willing to implement changes based on the recommendations of my network     | 190   | <b>50.3</b> | 95      | <b>25.1</b> | 30       | <b>7.9</b>  | 63         | <b>16.7</b> |
| AHS managers were aware of the ideas put forward by my network                                                   | 130   | <b>34.4</b> | 76      | <b>20.1</b> | 54       | <b>14.3</b> | 118        | <b>31.2</b> |
| AHS managers were not willing to implement changes based on the recommendations of my network                    | 62    | <b>16.4</b> | 135     | <b>35.7</b> | 60       | <b>15.9</b> | 121        | <b>32.0</b> |

|                                                                                      | Agree |             | Neutral |             | Disagree |             | Don't know |             |
|--------------------------------------------------------------------------------------|-------|-------------|---------|-------------|----------|-------------|------------|-------------|
|                                                                                      | N     | %           | N       | %           | N        | %           | N          | %           |
| The network workplans and agendas were aligned with state government strategic plans | 180   | <b>52.5</b> | 60      | <b>17.5</b> | 18       | <b>5.2</b>  | 85         | <b>24.8</b> |
| NSW Health decision makers were not aware of the recommendations made by my network  | 34    | <b>9</b>    | 85      | <b>22.5</b> | 134      | <b>35.5</b> | 125        | <b>33.1</b> |
| <i>Network perceived as valuable</i>                                                 |       |             |         |             |          |             |            |             |
| The networks efforts have improved quality of care                                   | 273   | <b>72.8</b> | 50      | <b>13.3</b> | 23       | <b>6.1</b>  | 29         | <b>7.7</b>  |
| The networks efforts have improved patient outcomes                                  | 237   | <b>63.2</b> | 69      | <b>18.4</b> | 25       | <b>6.7</b>  | 44         | <b>11.7</b> |
| The work of the network has not led to health system improvements                    | 61    | <b>16.3</b> | 63      | <b>16.8</b> | 215      | <b>57.3</b> | 36         | <b>9.6</b>  |
| I would recommend joining this clinical network to a colleague                       | 269   | <b>71.7</b> | 68      | <b>18.1</b> | 29       | <b>7.7</b>  | 9          | <b>2.4</b>  |
| The network does not help me professionally                                          | 65    | <b>17.4</b> | 75      | <b>20.1</b> | 228      | <b>61.0</b> | 6          | <b>1.</b>   |
